# Supplementary material for: An Antibiotic-Loaded Silicone–Hydrogel Interpenetrating Polymer Network for the Prevention of Surgical Site Infections
Source: MDPI journal article supplement (doi:10.3390/gels9100826), 2023-10-19
Supplement: s1 [file s1]

## Supplementary Materials

**Figure S1: UV-vis spectra for standard drug concentrations**

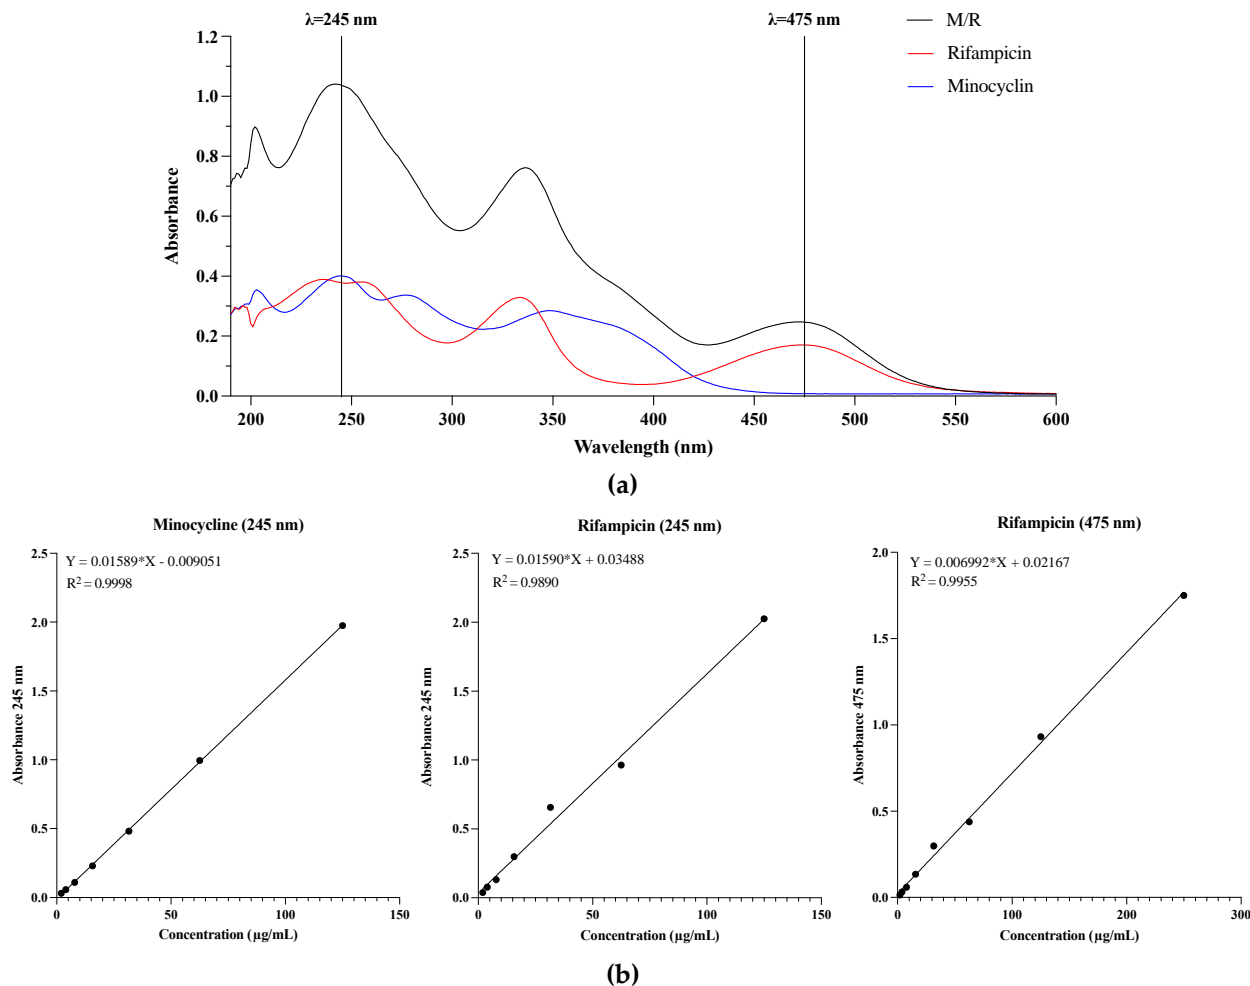

Figure S1. (a) UV-vis spectra ranging from 190 to 600 nm for pure minocycline and rifampicin and a mix of minocycline and rifampicin (M/R) in a 1:1 (15.625 $\mu\text{g/mL}$  w/w) mixture (black), rifampicin (red), and minocycline (blue). Wavelengths used for parallel quantifications are illustrated at  $\lambda=245$  nm and  $\lambda=475$  nm; (b) Calibration graphs of known minocycline and rifampicin concentrations aligned with the measured intensities of minocycline at 245 nm (left), rifampicin at 245 nm (middle) and rifampicin at 475 nm (right).

**Figure S2: Percentual daily drug release**

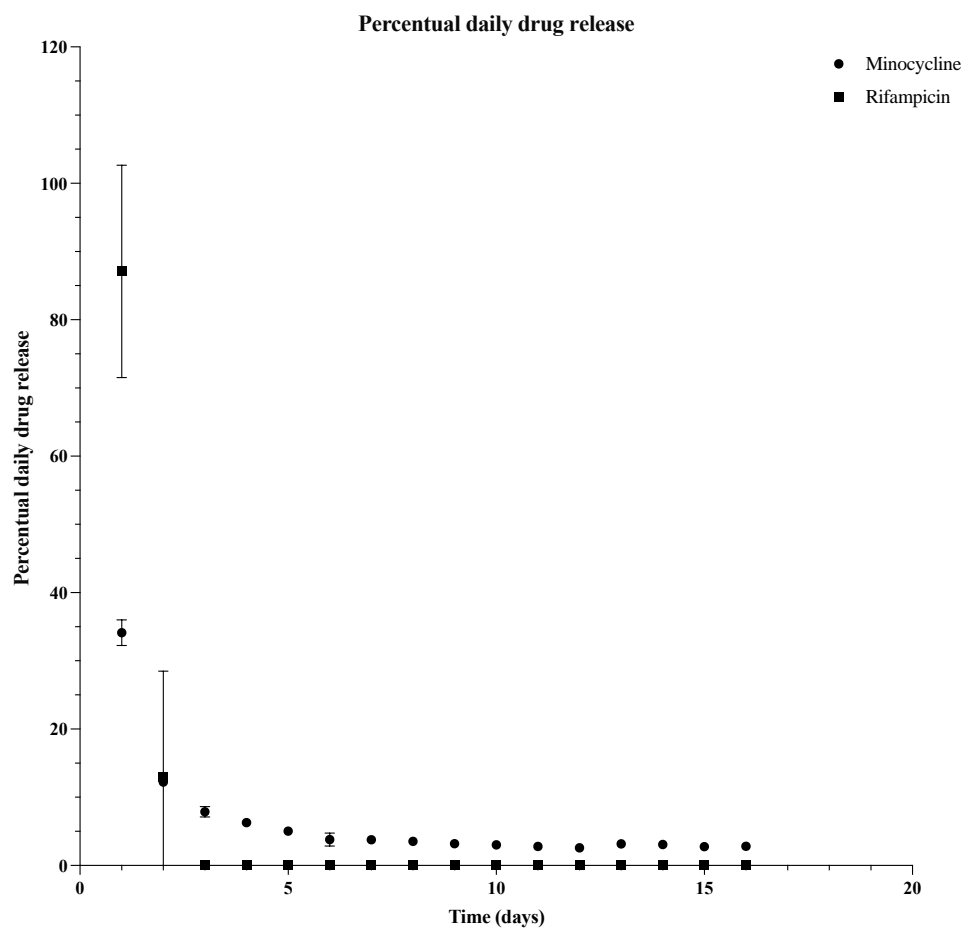

Figure S2: Percentual daily drug release of minocycline and rifampicin from the IPN material. Data are shown as means of four samples  $\pm$  standard deviation over a time span of 16 days.

**Figure S3: Minimum inhibitory concentration assay**

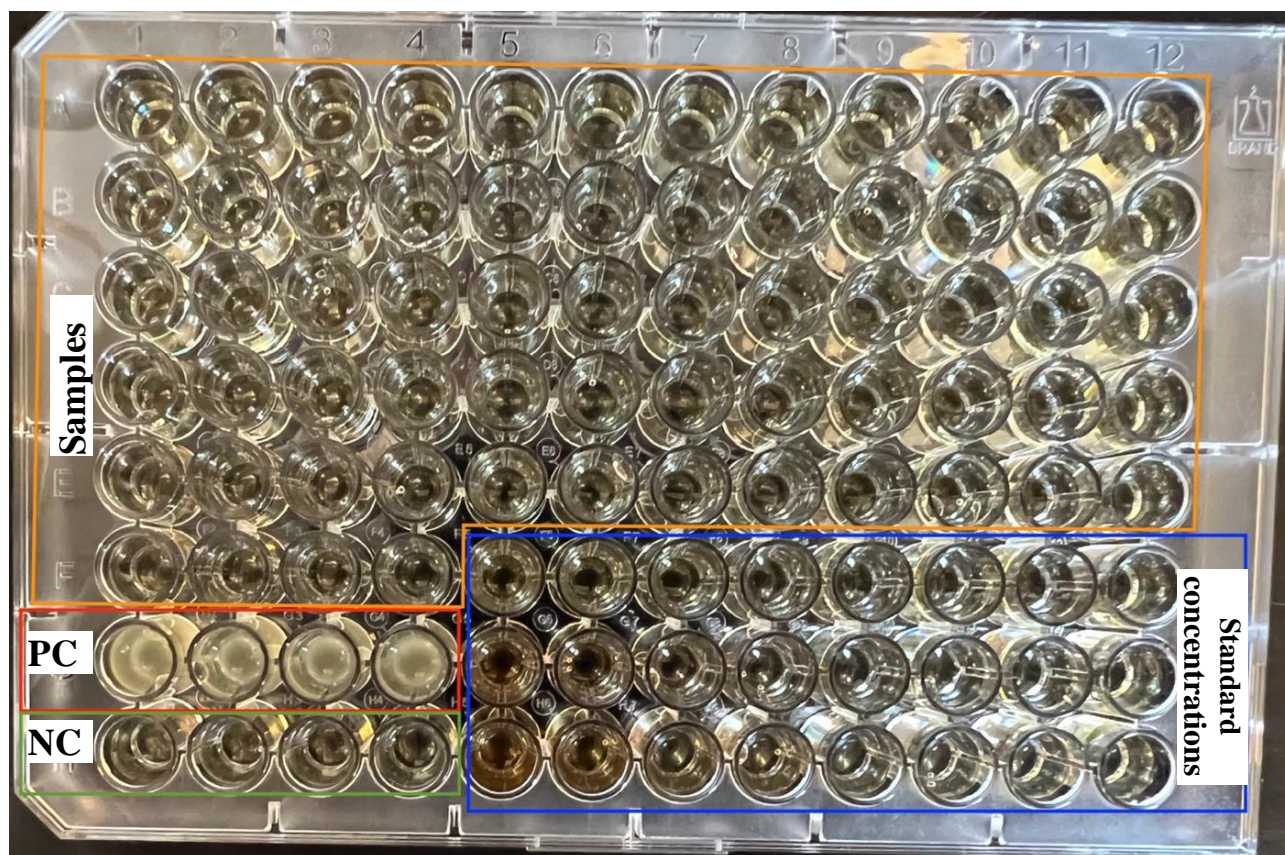

Figure S3. MIC assay of drug release medium against *S. aureus* (ATCC® 29213). Abbreviations; PC = positive controls, NC = negative controls.

**Figure S4: Agar disc diffusion assay**

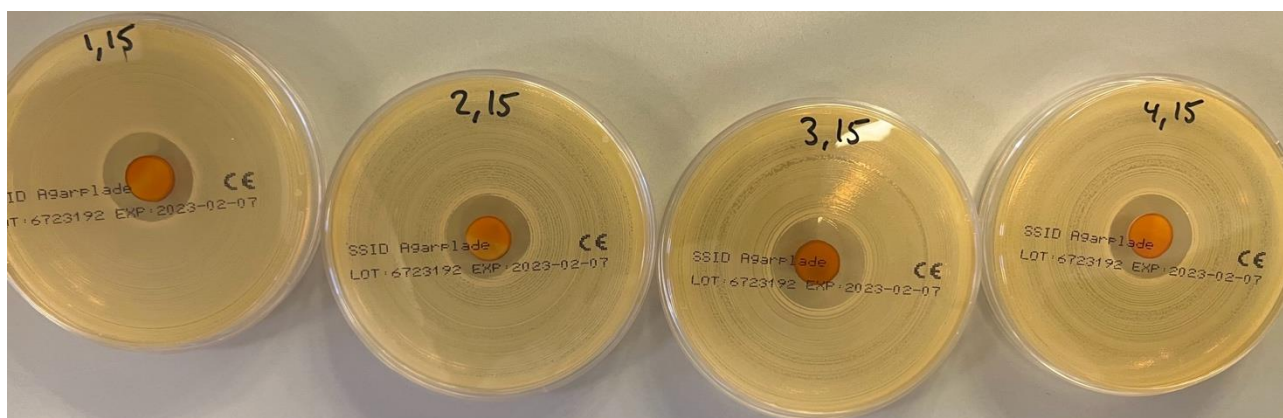

Figure S4. The inhibiting effect near the surface of the antibiotic loaded IPN patches against *S. aureus* (ATCC® 29213). Inhibition zones of loaded IPN patches after 15 days of release are shown.

**Figure S5: Agar disc diffusion assay – controls**

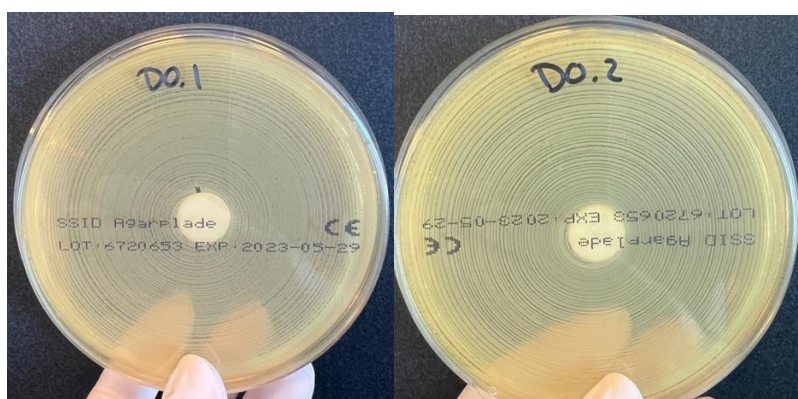

Figure S5. The inhibiting effect of non-loaded IPN patches against *S. aureus* (ATCC® 29213). IPN patches after 1 day are shown.
